# Supplementary material
Source: Research Square preprint supplement (doi:10.21203/rs.3.rs-9542123/v1)
Supplement: Supplementary file 1 [file 5d9713fdf926712b9ac218f5.pdf]

## Supplementary materials

### Supplementary Table 1

| Antibodies     | SOURCE      | IDENTIFIER |
|----------------|-------------|------------|
| $\beta$ -actin | Proteintech | 66009-1-Ig |
| USP9X          | Proteintech | 55054-1-AP |
| P-IRS1(Ser)    | Proteintech | 85238-1-RR |
| P-IRS1(Tyr)    | Abcam       | ab109543   |
| IRS1           | Proteintech | 17509-1-AP |
| P-AKT          | Proteintech | 66444-1-Ig |
| AKT            | Proteintech | 27809-1-AP |
| P-GSK3 $\beta$ | Proteintech | 67558-1-Ig |
| GSK3 $\beta$   | Proteintech | 22104-1-AP |
| FASN           | Proteintech | 10624-2-AP |
| ACC1           | Proteintech | 21923-1-AP |
| SCD1           | Proteintech | 28678-1-AP |
| SREBP1C        | Proteintech | 14088-1-AP |
| UB             | Proteintech | 10201-2-AP |
| HA tag         | Proteintech | 66006-2-Ig |
| FLAG tag       | Proteintech | 66008-4-Ig |
| MYC tag        | Proteintech | 60003-2-Ig |

### Supplementary Table 2

| GENE     | FORWARD                 | REVERSE                 |
|----------|-------------------------|-------------------------|
| H USP9X  | TCGGAGGGAATGACAACCAG    | GGAGTTGCCGGGAATTTCA     |
| M USP9X  | TCCAACAGAATCAGACTTCATCG | TGGAAATGCAGGTCCTCATCT   |
| M IL6    | CCAAGAGGTGAGTGCTTCCC    | CTGTTGTTTCAGACTCTCTCCCT |
| M Col1a1 | GCTCCTCTTAGGGGCCACT     | CCACGTCTCACCATTGGGG     |
| M aSMA   | CCCAACTGGGACCACATGG     | TACATGCGGGGACATTGAAG    |
| M TNFa   | GACGTGGAACCTGGCAGAAGAG  | TTGGTGGTTTGTGAGTGTGAG   |
